# Supplementary material
Source: publisher figshare collection journal article supplement (https://frontiersin.figshare.com/ndownloader/files/24173123)
Supplement: Supplementary file [file 24173123]

## Supplementary Material

### Recovery of the PHA Copolymer P(HB-*co*-HHx) with Non-Halogenated Solvents: Influences on Molecular Weight and HHx-Content

Moritz Bartels<sup>†,1</sup>, Björn Gutschmann<sup>†,2</sup>, Torsten Widmer<sup>1</sup>, Thomas Grimm<sup>1</sup>, Peter Neubauer<sup>2</sup>, Sebastian L. Riedel<sup>2\*</sup>

<sup>1</sup>ANiMOX GmbH, Max-Plank-Straße 3, 12489 Berlin, Germany

<sup>2</sup>Technische Universität Berlin, Institute of Biotechnology, Chair of Bioprocess Engineering, Ackerstraße 76, 13355 Berlin, Germany

\* Correspondence: Sebastian L. Riedel, [riedel@tu-berlin.de](mailto:riedel@tu-berlin.de)

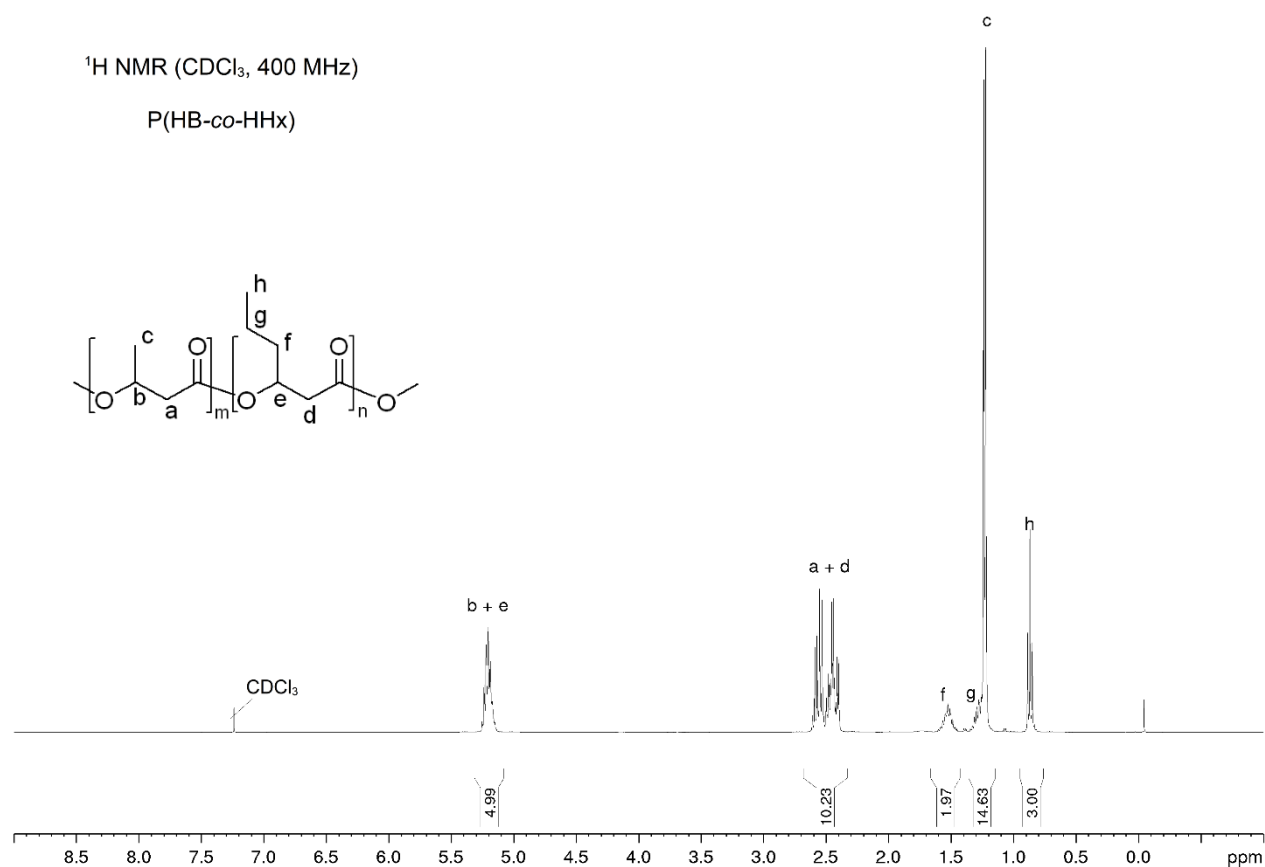

**Figure S1 | <sup>1</sup>H NMR spectrum of P(HB-*co*-HHx) with chloroform at RT for 2 h and precipitated with heptane. <sup>1</sup>H NMR (CDCl<sub>3</sub>, 400 MHz):  $\delta$  = 5.17 – 5.23 (m, 1H), 5.17 – 5.23 (m, 1H), 2.46 – 2.61 (m, 2H), 2.39 – 2.45 (m, 2H), 1.48 – 1.56 (m, 2H), 1.27 – 1.31 (m, 2H), 1.23 (d,  $J$ =6.3 Hz, 3H), 0.87 ppm (t,  $J$  = 7.3 Hz, 3H).**

Supplementary Material - Non-Halogenated  
Solvents for P(HB-*co*-HHx) Recovery

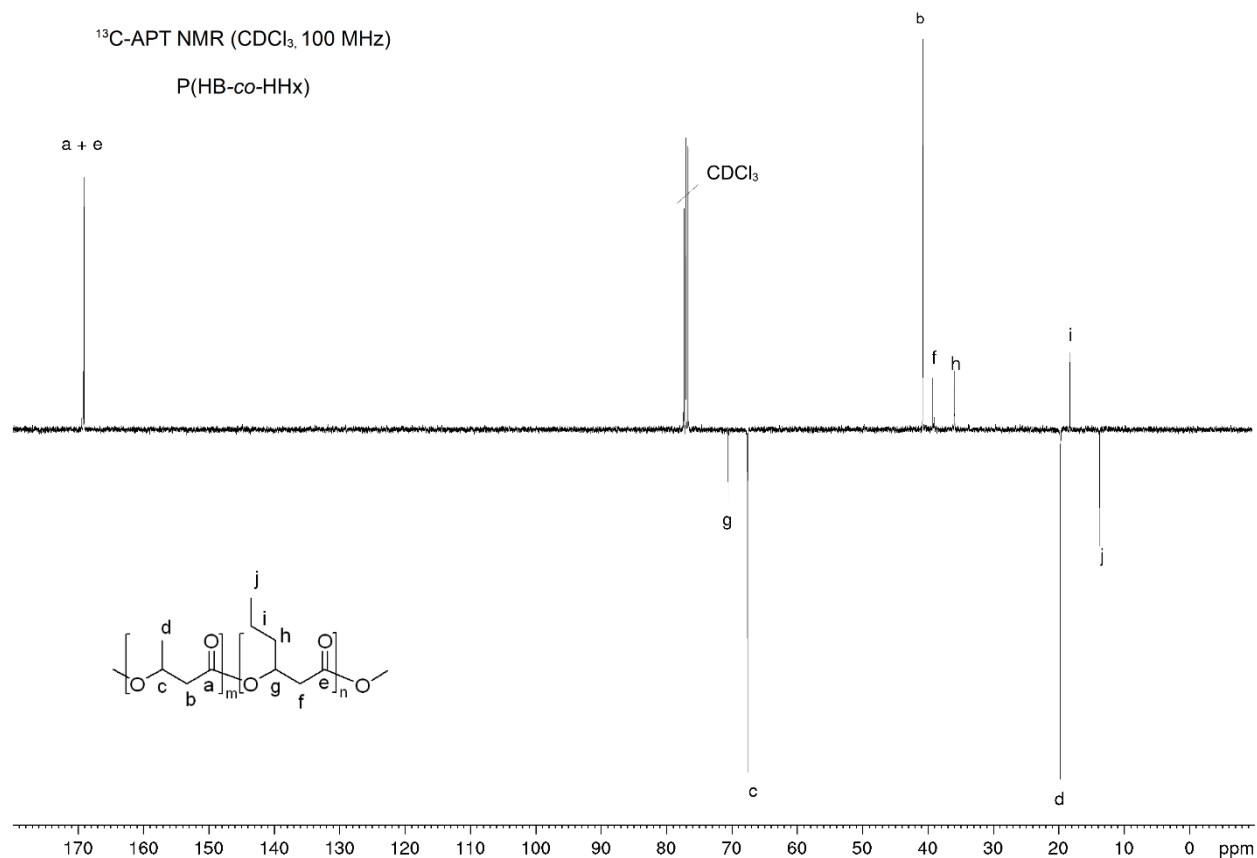

**Figure S2 | <sup>13</sup>C-APT NMR spectrum of P(HB-*co*-HHx) extracted with chloroform at RT for 2 h and precipitated with heptane. <sup>13</sup>C-APT NMR (CDCl<sub>3</sub>, 100 MHz):  $\delta$  = 169.2 (+), 169.1 (+), 70.5 (-), 67.6 (-), 40.7 (+), 39.2 (+), 36.0 (+), 19.7 (-), 18.3 (+), 13.7 (-) ppm.**

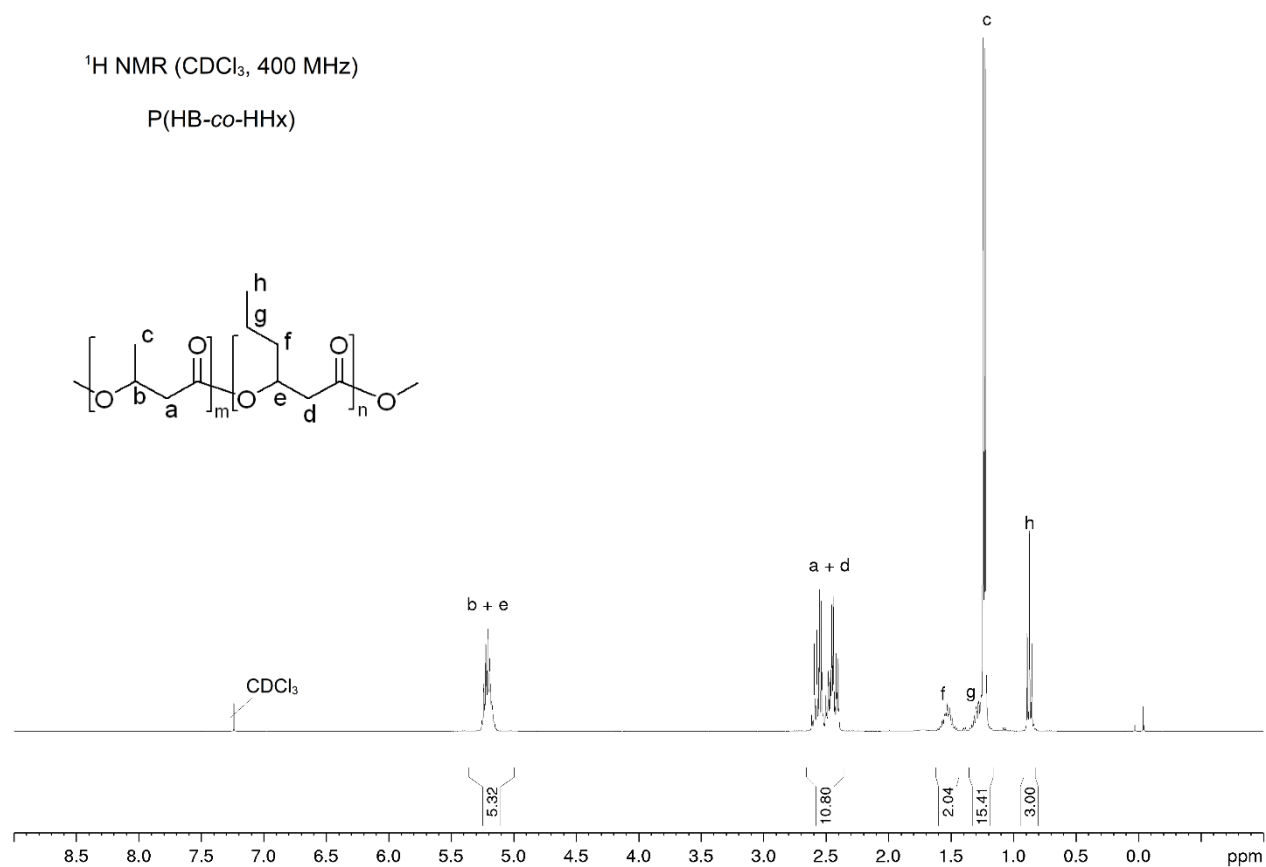

**Figure S3 |  $^1\text{H}$  NMR spectrum of P(HB-*co*-HHx) extracted with ethyl acetate at RT for 2 h and precipitated with 2-propanol.  $^1\text{H}$  NMR ( $\text{CDCl}_3$ , 400 MHz):  $\delta$  = 5.17 – 5.23 (m, 1H), 5.17 – 5.23 (m, 1H), 2.46 – 2.61 (m, 2H), 2.39 – 2.45 (m, 2H), 1.48 – 1.56 (m, 2H), 1.27 – 1.31 (m, 2H), 1.23 (d,  $J$ =6.3 Hz, 3H), 0.87 ppm (t,  $J$  = 7.3 Hz, 3H).**

Supplementary Material - Non-Halogenated  
Solvents for P(HB-*co*-HHx) Recovery

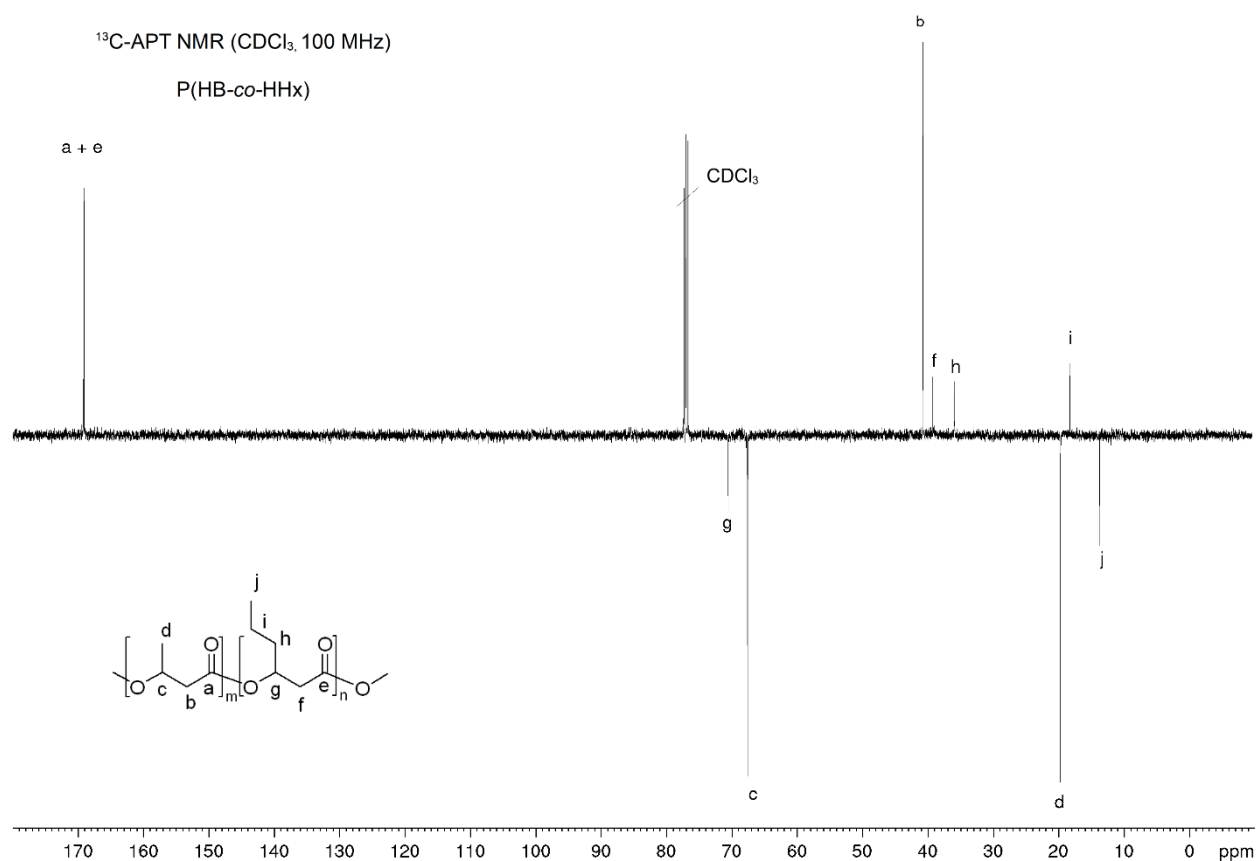

**Figure S4 | <sup>13</sup>C-APT NMR spectrum of P(HB-*co*-HHx) extracted with ethyl acetate at RT for 2 h and precipitated with 2-propanol. <sup>13</sup>C-APT NMR (CDCl<sub>3</sub>, 100 MHz):  $\delta$  = 169.2 (+), 169.1 (+), 70.5 (-), 67.6 (-), 40.7 (+), 39.2 (+), 36.0 (+), 19.7 (-), 18.3 (+), 13.7 (-) ppm.**

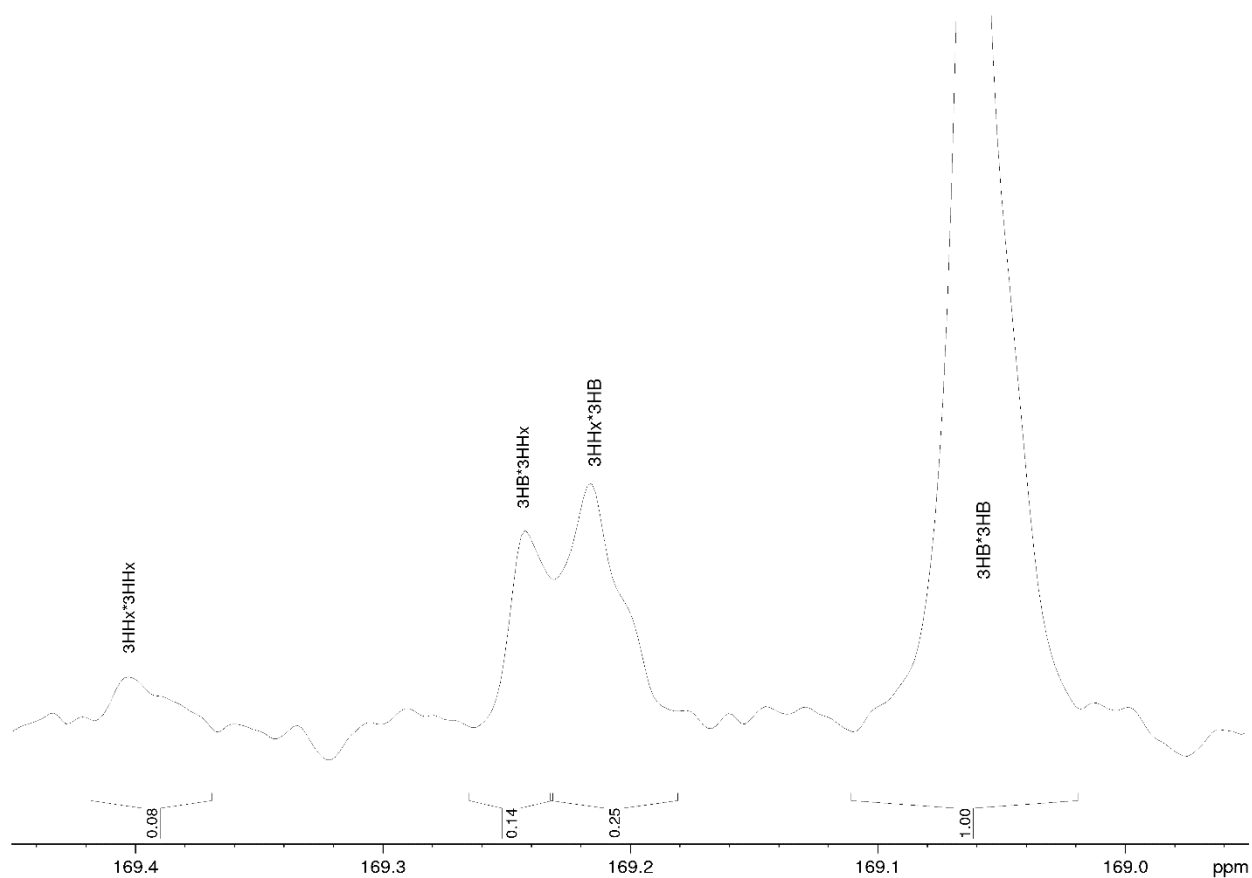

**Figure S5 | Zoom of  $^{13}\text{C}$ -APT NMR spectrum of P(HB-*co*-HHx) extracted with acetone at RT for 2 h and precipitated with 2-propanol. Peaks were used for calculation of randomness.**

**Supplementary Material - Non-Halogenated  
Solvents for P(HB-*co*-HHx) Recovery**

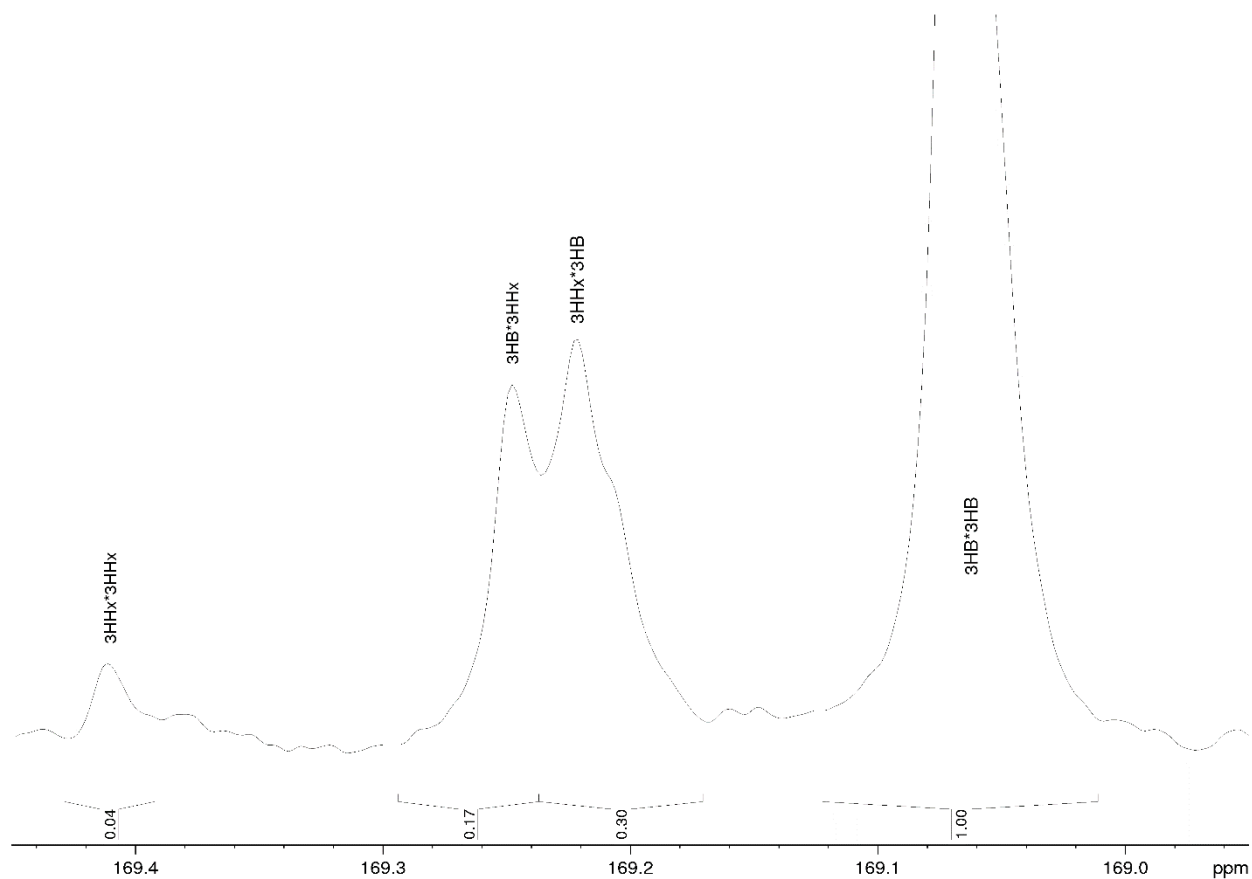

**Figure S6 | Zoom of  $^{13}\text{C}$ -APT NMR spectrum of P(HB-*co*-HHx) extracted with chloroform at RT for 2 h and precipitated with heptane. Peaks were used for calculation of randomness.**

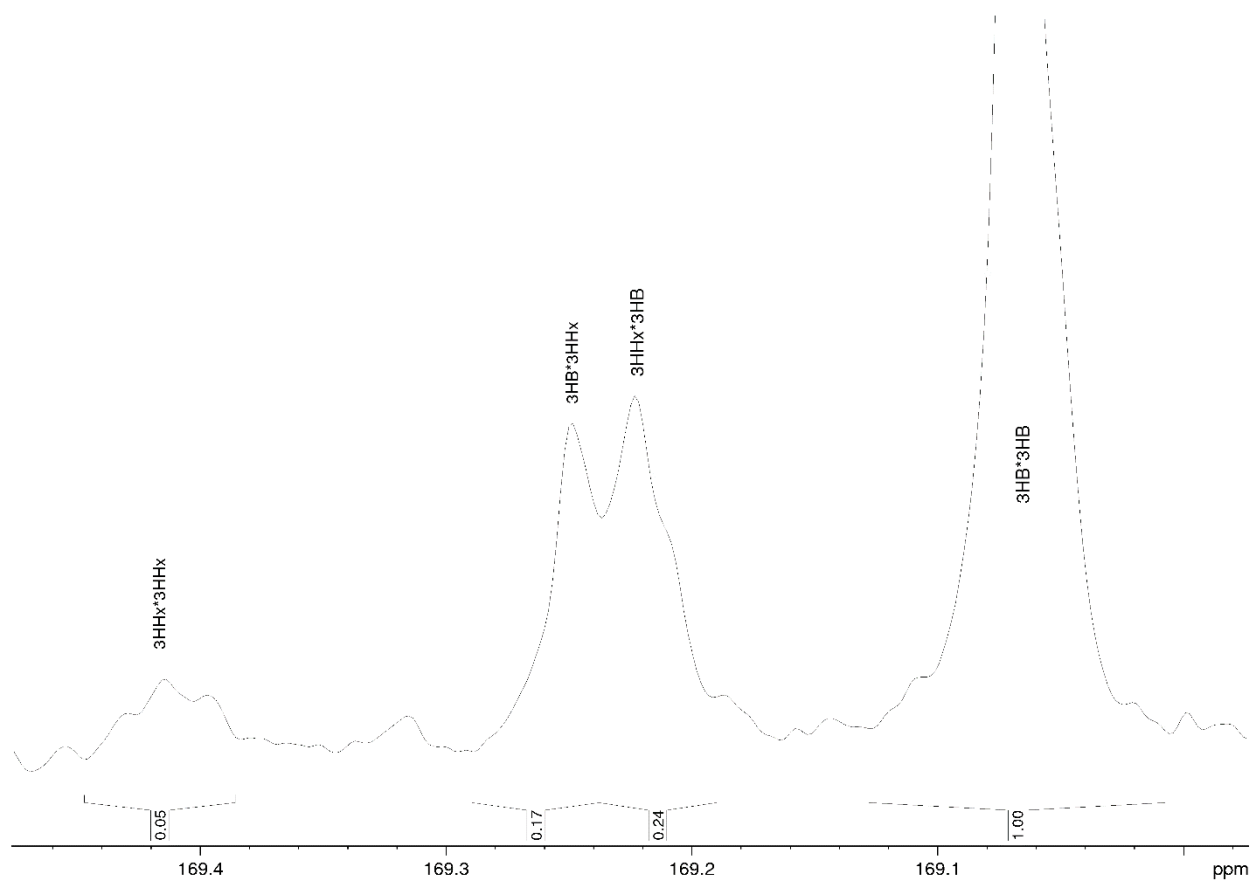

**Figure S7 | Zoom of  $^{13}\text{C}$ -APT NMR spectrum of P(HB-*co*-HHx) extracted with ethyl acetate at RT for 2 h and precipitated with 2-propanol. Peaks were used for calculation of randomness.**
